# Supplementary material for: Switching the resistive memory behavior from binary to ternary logicviasubtle polymer donor and molecular acceptor design
Source: Royal Society of Chemistry journal article supplement (doi:10.1039/d1tc00071c), 2021-01-01
Supplement: d1tc00071c1.pdf [file d1tc00071c1.pdf]

## Supplementary Information

### Switching of resistive memory behavior from binary to ternary logic via subtle polymer donor and molecular acceptors design

Saihu Pan,<sup>a</sup> Zhiqiang Zhu,<sup>a</sup> Hang Yu,<sup>a</sup> Weixia Lan,<sup>\*b</sup> Bin Wei<sup>b</sup> and Kunping Guo<sup>\*b,c</sup>

<sup>a</sup> School of Microelectronics and Control Engineering, Changzhou University, Changzhou, 213164, PR China

<sup>b</sup> School of Mechatronic Engineering and Automation, Key Laboratory of Advanced Display and System Applications, Ministry of Education, Shanghai University, Shanghai, 200072, PR China

<sup>c</sup> London Centre for Nanotechnology, University College London, London WC1H 0AH, UK

\* Corresponding author.

E-mail address: [weixia\\_lan@shu.edu.cn](mailto:weixia_lan@shu.edu.cn) (W. Lan), [kunping.guo@ucl.ac.uk](mailto:kunping.guo@ucl.ac.uk) (K. Guo).

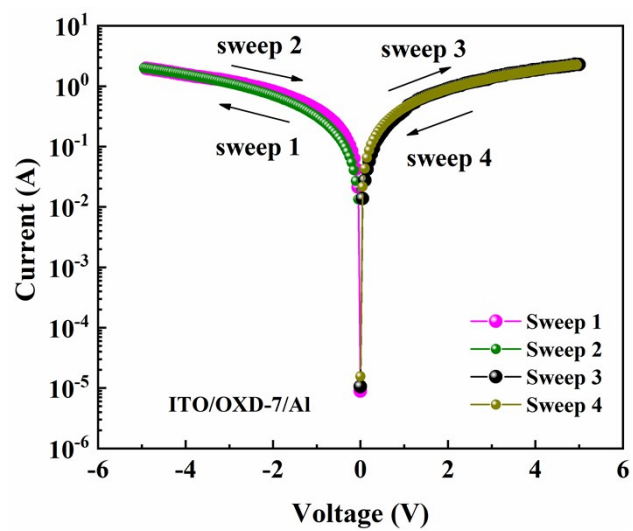

Figure S1.  $I$ - $V$  characteristic of the device incorporating neat OXD-7.

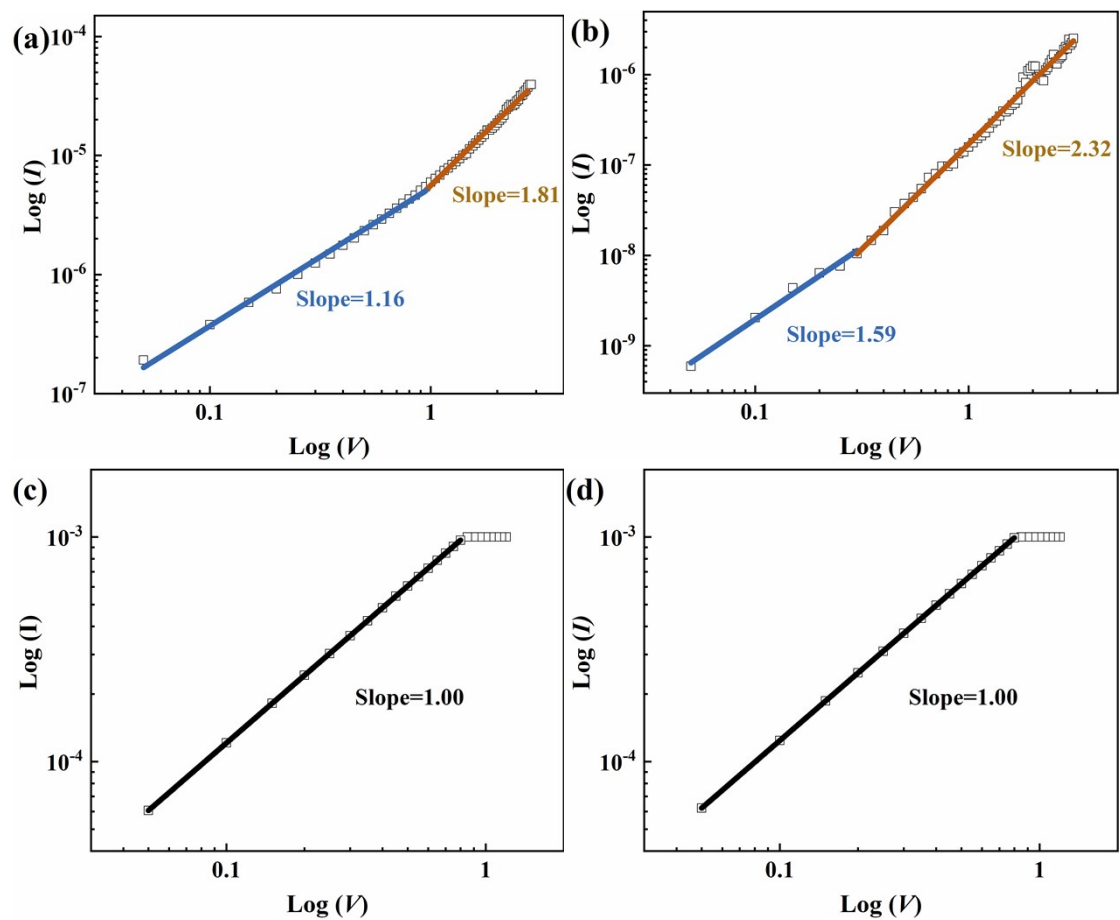

**Figure S2.** Analysis of  $I$ - $V$  characteristics for the ITO/PVK: OXD-7: PBD/Al devices. (a) OFF and (c) ON states for device containing 26 wt% of OXD-7 and 4 wt% of PBD. (b) OFF and (d) ON states for device containing 20 wt% of OXD-7 and 10 wt% of PBD.

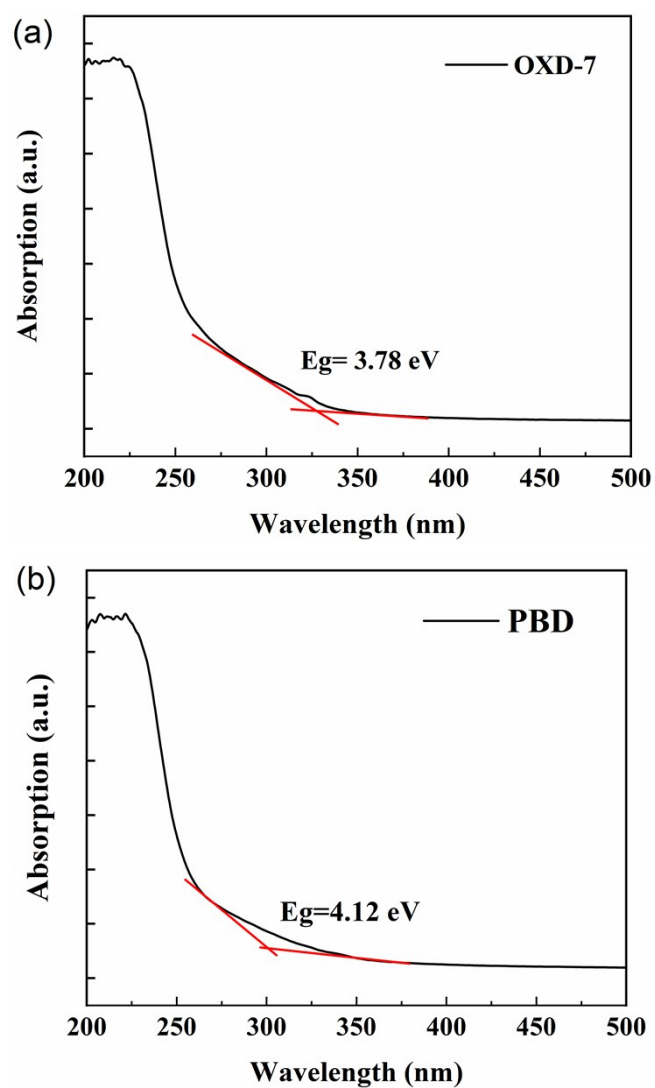

**Figure S3.** Absorption edge of the optical absorption spectra of (a) OXD-7 and (b) PBD.

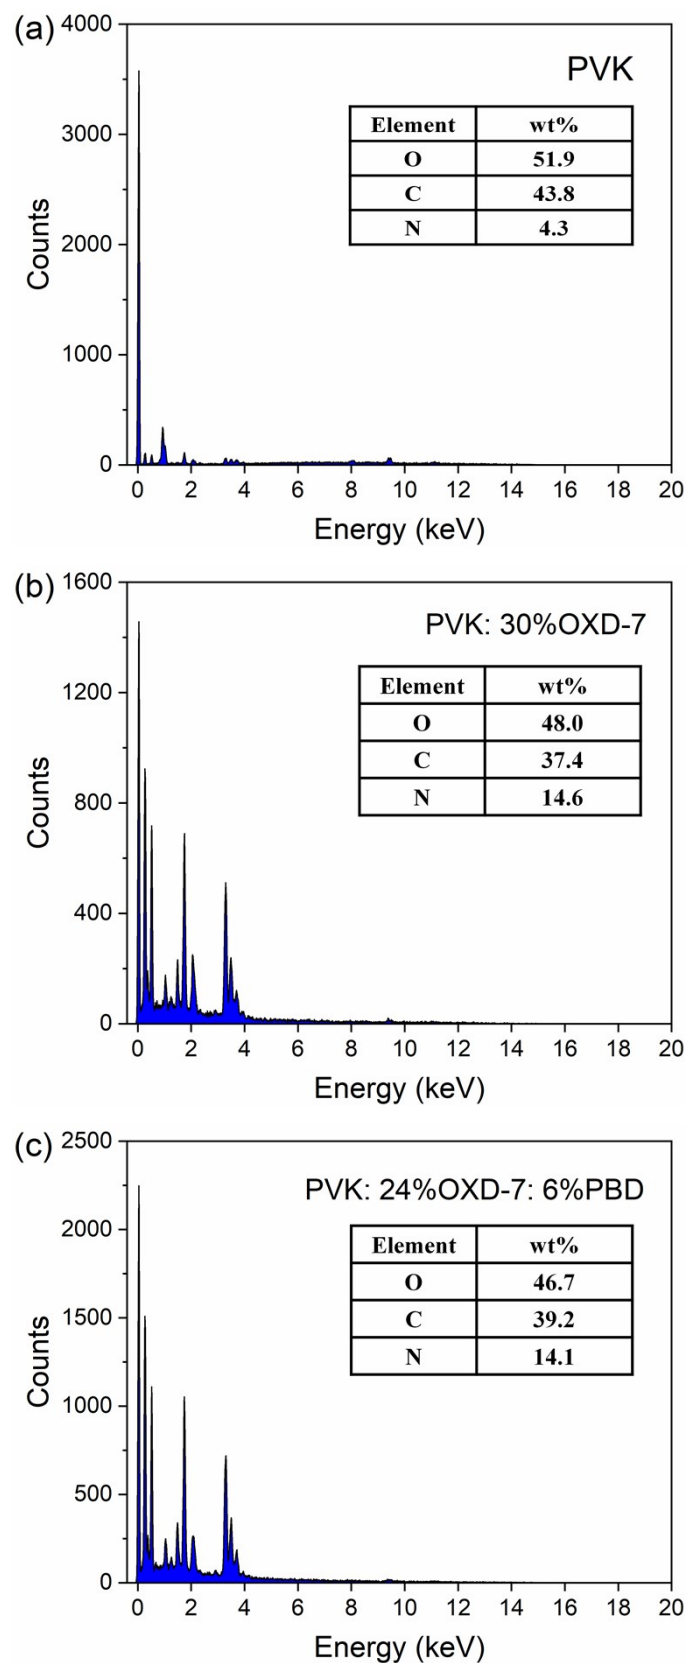

**Figure S4.** EDX spectra for (a) neat PVK, (b) PVK: 30%OXD-7 and (c) PVK: 24%OXD-7: PBD films.

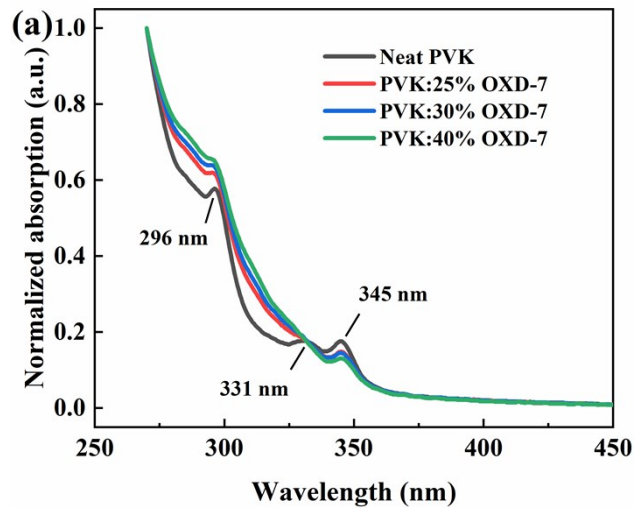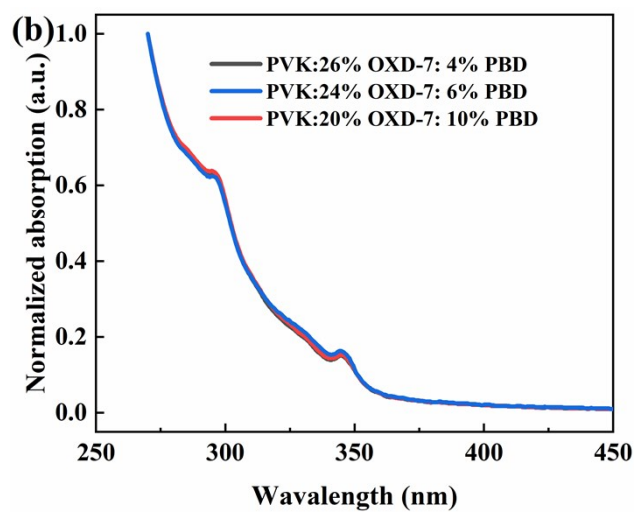

**Figure S5.** Normalized UV-Vis absorption spectra of (a) neat PVK, blended PVK: OXD-7, and (b) PVK: OXD-7: PBD films spin-cast on fused silica substrates.

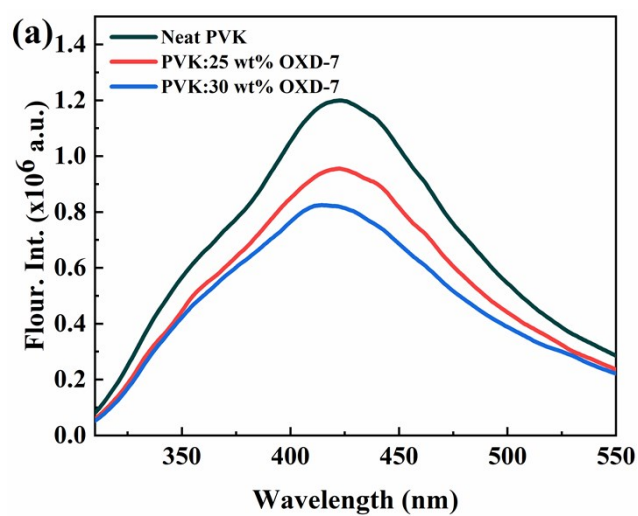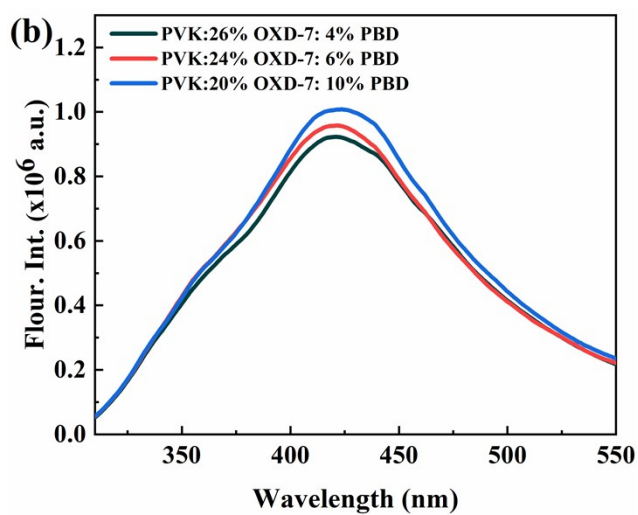

**Figure S6.** Fluorescence spectra of the (a) PVK: OXD-7 and (b) PVK: OXD-7: PBD films in the ON state under electrical biases ( $\lambda_{\text{ex}} = 290$  nm).

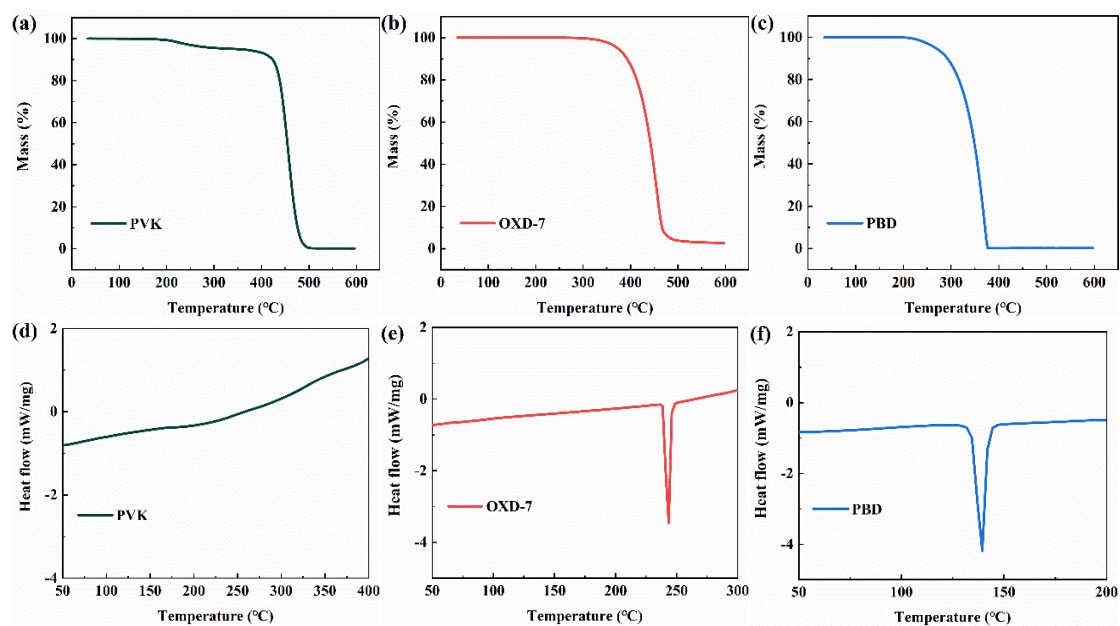

**Figure S7.** TGA thermograms of (a) PVK, (b) OXD-7 and (c) PBD under nitrogen. DSC thermal analysis of (d) PVK, (e) OXD-7 and (f) PBD under nitrogen.



**Table S1.** Thickness of neat and blend PVK films.

| Film                          | Thickness (nm $\pm$ SD) |
|-------------------------------|-------------------------|
| PVK                           | 74.2 $\pm$ 2.5          |
| PVK: 25 wt% OXD-7             | 72.9 $\pm$ 1.9          |
| PVK: 30 wt% OXD-7             | 68.9 $\pm$ 2.5          |
| PVK: 40 wt% OXD-7             | 69.2 $\pm$ 2.0          |
| PVK: 26 wt% OXD-7: 4 wt% PBD  | 72.2 $\pm$ 2.3          |
| PVK: 24 wt% OXD-7: 6 wt% PBD  | 73.3 $\pm$ 2.4          |
| PVK: 20 wt% OXD-7: 10 wt% PBD | 71.5 $\pm$ 2.6          |
